1 **Title:** Adherence to the iDSI reference case among published cost-per-DALY averted studies

2

3 **Short title:** CEA adherence to the iDSI reference case

4

5

6 **Authors:** Joanna Emerson, MPH<sup>1</sup>; Ari Panzer<sup>1</sup>; Joshua T. Cohen, PhD<sup>1</sup>; Kalipso Chalkidou,  
7 MD, PhD<sup>2</sup>; Yot Teerawattananon, MD, PhD<sup>3</sup>; Mark Sculpher, PhD<sup>4</sup>; Thomas Wilkinson, MSc<sup>5</sup>;  
8 Damian Walker, PhD<sup>6</sup>; Peter J. Neumann, ScD<sup>1</sup> & David D. Kim, PhD<sup>1</sup>.

9

10 <sup>1</sup> Center for the Evaluation of Value and Risk in Health, Tufts Medical Center, Boston, MA;

11 <sup>2</sup> Institute of Global Health Innovation, Imperial College London, London, UK;

12 <sup>3</sup> The Saw Swee Hock School of Public Health, National University of Singapore, Singapore;

13 <sup>4</sup> Centre for Health Economics, University of York, York, UK;

14 <sup>5</sup> Health Economics Unit, School of Public Health and Family Medicine, University of Cape  
15 Town, South Africa;

16 <sup>6</sup> Bill & Melinda Gates Foundation, Seattle, WA;

17

18 **Corresponding author:**

19 David D. Kim, PhD

20 Center for the Evaluation of Value and Risk in Health

21 Institute for Clinical Research and Health Policy Studies

22 Tufts Medical Center

23 800 Washington St, Box 063

24 Boston, MA 02111, USA

25 Email: [DKim3@tuftsmedicalcenter.org](mailto:DKim3@tuftsmedicalcenter.org)

26 Tel: 617-636-5769

27 Fax: 617-636-8628

28 **Abstract**

29 **Background:** The iDSI reference case, originally published in 2014, aims to improve the quality  
30 and comparability of cost-effectiveness analyses (CEAs). This study assesses whether the  
31 development of the guideline has improved the reporting and methodology for CEAs using  
32 disability-adjusted life-years (DALYs).

33 **Methods:** We analyzed the Tufts Medical Center Global Health CEA Registry to identify cost-  
34 per-DALY averted studies published from 2011 to 2017. Among each of 11 principles in the  
35 iDSI reference case, we translated all reporting standards and methodological specifications into  
36 quantifiable yes/no questions and awarded articles one point for each item satisfied. We then  
37 separately calculated reporting and methods scores, measured as percent adherence (0%=no  
38 adherence, 100%=full adherence). Using the year 2014 as the dissemination period, we  
39 conducted a pre-post analysis. Additionally, we conducted an analysis stratified by the 11  
40 principles and examined different scoring strategies and dissemination periods in sensitivity  
41 analyses.

42 **Results:** Articles averaged 74% adherence to reporting standards and 60% adherence to  
43 methodological specifications. Adherence to reporting standards increased slightly over time  
44 (72% pre-2014 vs. 75% post-2014,  $p<0.01$ ), but methodological adherence did not significantly  
45 improve (59% pre-2014 vs. 60% post-2014,  $p=0.53$ ). Overall, reporting adherence scores  
46 exceeded methodology adherence scores (74% vs. 60%,  $p<0.001$ ). Articles seldom addressed  
47 budget impact (9% reporting, 10% methodology) or equity (7% reporting, 7% methodology).

48 **Conclusions:** The iDSI reference case has substantial potential to serve as a useful resource for  
49 researchers and policy-makers in global health settings, but greater effort to promote adherence  
50 and awareness is needed to achieve its potential.

## 51 **Background**

52           Since the original Panel on Cost-Effectiveness in Health and Medicine proposed the use  
53 of a reference case as a benchmark of quality and methodological rigor (1, 2), various guidelines  
54 for conducting economic analyses have been proposed (3, 4). Over the last two decades, many  
55 countries, particularly high-income ones, have developed their own reference cases to inform  
56 decision-making in their health care systems (5-8). In contrast, most low- and middle-income  
57 countries (LMICs) have not developed such guidelines, possibly due to their limited capacity to  
58 do so (9).

59           To address the need for a reference case that could apply to different contexts,  
60 particularly in LMICs, the Bill and Melinda Gates Foundation (BMGF) supported the  
61 development of the Gates Reference Case for Economic Evaluation to ensure high quality and  
62 transparent analyses (10). The first version was published in 2014 as the Gates Reference Case  
63 and, later in 2016, was renamed the International Decision Support Initiative (iDSI) Reference  
64 Case (10, 11) to convey the breadth of its intended applicability. The iDSI Reference Case fills a  
65 major gap in global health economics, as it serves as the only resource of best practices for  
66 economic evaluation for many LMICs looking for guidance on resource prioritization. To date,  
67 however, no study has examined the extent to which economic evaluations adhere to the iDSI  
68 guidelines. We aimed to evaluate whether the development of the iDSI reference case has  
69 improved adherence to best practices for economic evaluations in global health settings,  
70 particularly cost-effectiveness analyses (CEAs) using disability-adjusted life years (DALYs).

71 **Methods**

72 ***Data***

73 *The iDSI Reference Case* The iDSI reference case includes 11 principles: transparency,  
74 comparator, evidence, measures of health outcome, costs, time horizon/discount rate,  
75 perspective, heterogeneity, uncertainty, budget impact, and equity considerations. Each principle  
76 has a number of corresponding methodological specifications to guide study design, and  
77 reporting standards to inform the communication of findings (Table 1). By using this tiered  
78 structure, the Reference Case aims to serve as a framework that both provides best practice  
79 guidance while allowing for flexibility depending on context. (11)

80

81 **Table 1: The iDSI reference case: simplified principles, methodological specifications and**  
 82 **reporting standards**

| Reference Case Principle                                         | Methodological specification, simplified                                                                                                                      | Reporting standards, simplified                                                                                                               |
|------------------------------------------------------------------|---------------------------------------------------------------------------------------------------------------------------------------------------------------|-----------------------------------------------------------------------------------------------------------------------------------------------|
| Transparency                                                     | Decision problem, limitations, and declarations of interest are appropriately characterized.                                                                  | Decision problem (population, intervention, comparator, outcome), evaluation's limitations, and declarations of interest are fully described. |
| Comparator(s)                                                    | Intervention(s) currently offered to the population (standard of care) is the base case comparator.                                                           | Comparator and its availability is clearly stated, and outcomes reported in incremental cost effectiveness ratio.                             |
| Evidence                                                         | Systematic literature review is used as source of evidence.                                                                                                   | Methods of evidence collection are stated and sources of parameters are cited.                                                                |
| Measure of health outcome <sup>†</sup>                           | DALYs are used as the base case outcome measure.                                                                                                              | Methods for weighting of DALYs are stated.                                                                                                    |
| Costs                                                            | Costs are relevant to the context and stated perspective, and include implementation costs.                                                                   | Costs are reported in local currency and USD.                                                                                                 |
| Time horizon and discount rate                                   | Lifetime time horizon and 3% discount rate for costs and outcomes are used in base case.                                                                      | Time horizon and discount rate are clearly stated.                                                                                            |
| Non-health effects and costs outside health budget (perspective) | Societal perspective is used in base case, and relevant costs to this perspective (including direct health costs) are included.                               | Perspective and base case outcomes are clearly stated.                                                                                        |
| Heterogeneity                                                    | Heterogeneity is analyzed for appropriate subgroups.                                                                                                          | Subgroup characteristics and analysis of heterogeneity are clearly described.                                                                 |
| Uncertainty                                                      | Sensitivity analyses are performed on parameter source uncertainty (deterministic), parameter precision (probabilistic), and analysis structure (structural). | Magnitude of uncertainty in the model's structure, parameters, and precision are reported.                                                    |
| Budget impact                                                    | Intervention(s) budget impact is assessed.                                                                                                                    | Intervention(s) budget impact is reported.                                                                                                    |
| Equity considerations                                            | Intervention(s) implications on equity are assessed.                                                                                                          | Intervention(s) implications on equity are stated.                                                                                            |

83 DALY: disability-adjusted life year; USD: United States dollar.

84 <sup>†</sup> The initial Gates reference case specified DALYs as a measure of health outcomes, but the 2016 iDSI Reference Case endorsed both QALY and  
 85 DALY as appropriate measures because the focus should be placed on the principle to use outcome measures that are generalizable across disease  
 86 states and capture positive and negative effects on both mortality and morbidity. Because all of our included studies used DALY as a measure of  
 87 health outcomes, the change made in the 2016 iDSI Reference Case would not influence our results.

88 *Global Health CEA Registry*

89 We analyzed data from the Tufts Medical Center Global Health CEA Registry, a  
90 continually updated database of English-language economic evaluations in the form of cost-per-  
91 DALYs averted (12). Among 620 cost-per-DALY averted studies in the database, we selected a  
92 subset (N = 398) published three years before and after the initial release of the iDSI reference  
93 case (2011-2017) to examine the impact of its publication on the literature. We focused  
94 particularly on economic evaluations using the DALY metric because it is recommended as a  
95 main outcome metric by the iDSI Reference Case and it is used more often as a health outcome  
96 measure in LMICs than equivalent metrics such as the Quality-Adjusted Life Year (QALY). (11,  
97 13)

98 To ensure a comprehensive assessment of adherence to the reference case, two  
99 independent readers (JE and AP) extracted additional information from each study in our sample  
100 using REDCap, an online survey platform (14), including data on: currency reported; subgroup  
101 analyses conducted; limitations reported; structural sensitivity analyses conducted; budget  
102 impact conducted; justification of alternative methodology; and comparator setting.

103 *Adherence score*

104 We first translated all 30 methodological specifications and 38 reporting standards  
105 (across 11 principles) listed in the reference case into questions with discrete yes/no outcomes  
106 (Appendix S1). We then designated reference case elements as “required” or “optional” based on  
107 our interpretation of the language in the report. We deemed 19 methodological and 21 reporting  
108 specifications “required”.

109

110 **Appendix S1: Reference case evaluation method**

111 Our base-case analysis examined adherence scores consisting only of “required”  
112 elements. We evaluated each published cost-per-DALY averted study’s adherence to reporting  
113 standards (0-21 items) and methodological specifications (0-19 items). We then recorded for  
114 each article an overall reporting adherence score (proportion of 21 reporting standards adhered  
115 to) and an overall methodological adherence score (proportion of 19 methodological  
116 specifications adhered to).

## 117 **Analysis**

### 118 *Descriptive analysis*

119 We examined the association between adherence score and certain study characteristics,  
120 including whether the study cited the reference case, the study funder characteristics, and journal  
121 attributes. We categorized study funders into the following groups (not mutually exclusive):  
122 academic, government, healthcare organization, industry, intergovernmental organization,  
123 BMGF, non-BMGF, and other. We also stratified selected articles into clinical versus non-  
124 clinical journals using SCImago Journal Rank’s subject categorization (medicine vs. health  
125 policy, public health, non-health) (15). Finally, we recorded 2016 journal impact factor quartiles  
126 and categorized studies as high impact (first quartile), medium impact (second quartile), or low-  
127 impact (third and fourth quartiles) (15).

### 128 *Statistical analysis*

129 To examine whether the iDSI guideline has since its release in 2014 improved the  
130 reporting and methodology for cost-per-DALY averted studies, we calculated mean adherence  
131 scores by year from 2011 to 2017. We conducted a pre-post analysis of improvement in  
132 methodological and reporting adherence using Student’s t-test. We considered the year 2014 to



133 be the reference case’s dissemination period, and hence did not include articles published during  
134 that year in our pre-post analysis. We also compared the overall methodological specifications  
135 and reporting standards adherence scores, stratified by the 11 principles, using Student’s t-test.

### 136 *Sensitivity analysis*

137 We conducted three sensitivity analyses. First, we included the “optional” specifications  
138 in the calculation of adherence scores for a random 10% subset of the articles to explore the  
139 impact of including optional items in the adherence score. Second, we removed 2015 from the  
140 post-evaluation period, limiting it to 2016-17, to examine the influence of alternative assumed  
141 dissemination period durations. Third, we used an alternative classification rule to score the one  
142 required adherence item pertaining to the comparator principle. To score the required comparator  
143 item “adherent”, our base case required the analysis to include as the comparator an intervention  
144 explicitly referred to as “standard of care”, a designation that can represent a range of possible  
145 interventions. Our sensitivity analysis scored any listed comparator other than “do-nothing”  
146 interventions as adherent. We designated “do-nothing” interventions as non-adherent to remain  
147 consistent with the principle that standard of care must at least be “minimal supportive care [...]”  
148 provided for that specification indication and patient group” in this sensitivity analysis (16).

## 149 **Results**

### 150 *Descriptive statistics*

151 Among 398 cost-per-DALY averted studies published from 2011-2017, 215 (54%)  
152 focused on LMICs and 263 (68%) targeted communicable diseases, such as diarrhea, HIV/AIDs,  
153 tuberculosis, and malaria (Table 2). Articles averaged 74% adherence to the reference case’s

10/1/2018

154 reporting standards and 60% adherence to the methodological specifications (Table 3). No article  
155 achieved full adherence to either the methodological specifications or the reporting standards.  
156

157 **Table 2: Characteristics of cost-per-DALY averted studies published 2011-2017 in Tufts**  
 158 **Medical Center Global Health Cost-Effectiveness Registry**

|                                                                   | Number of studies | % of the sample |
|-------------------------------------------------------------------|-------------------|-----------------|
| <b>GBD Super Region</b>                                           |                   |                 |
| Sub-Saharan Africa                                                | 125               | 31.4            |
| High Income                                                       | 66                | 17.0            |
| Multiple Regions #                                                | 52                | 13.1            |
| Southeast Asia, East Asia, and Oceania                            | 45                | 11.6            |
| South Asia                                                        | 36                | 9.3             |
| Latin America and Caribbean                                       | 33                | 8.5             |
| N/A                                                               | 22                | 5.7             |
| North Africa and Middle East                                      | 10                | 2.6             |
| Central Europe, Eastern Europe, and Central Asia                  | 9                 | 2.3             |
| <b>Intervention*</b>                                              |                   |                 |
| Pharmaceutical                                                    | 112               | 28.1            |
| Immunization                                                      | 106               | 26.6            |
| Care delivery                                                     | 74                | 18.6            |
| Health education or behavior                                      | 73                | 18.3            |
| Screening                                                         | 63                | 15.8            |
| Surgery                                                           | 36                | 9.1             |
| Other                                                             | 34                | 8.5             |
| Medical procedure                                                 | 15                | 3.8             |
| <b>GBD Disease Category</b>                                       |                   |                 |
| Other                                                             | 90                | 22.6            |
| Diarrhea, LRI, and other common infectious diseases               | 79                | 21.1            |
| HIV/AIDS and tuberculosis                                         | 79                | 21.1            |
| Neglected tropical diseases and malaria                           | 41                | 11.0            |
| Mental and behavioral disorders                                   | 28                | 7.5             |
| Other communicable, maternal, neonatal, and nutritional disorders | 25                | 6.7             |
| Cardiovascular and circulatory disease                            | 24                | 6.4             |
| Diabetes, urogenital, blood, and endocrine disorders              | 16                | 4.3             |
| Neoplasms                                                         | 12                | 3.2             |
| Digestive diseases                                                | 4                 | 1.1             |
| <b>Study sponsor*</b>                                             |                   |                 |
| Government                                                        | 153               | 38.4            |
| Foundation                                                        | 124               | 31.2            |
| Academics                                                         | 53                | 13.3            |
| Intergovernmental Org                                             | 41                | 10.3            |
| Other                                                             | 24                | 6.0             |
| Healthcare Org <sup>^</sup>                                       | 23                | 5.8             |
| Industry                                                          | 16                | 4.0             |

# “Multiple regions”: studies that reported cost-effectiveness estimates for countries in different regions.\*  
 Not mutually exclusive. GBD: Global burden of disease. ^ Health care organizations include insurance companies, hospitals. LRI: Lower respiratory infection.

159 **Table 3: Reference case adherence scores and percentages by year, sponsor, and journal**  
 160 **aspects**

|                        | N   | Methodological specification score<br>(max 19) |     |     |                     | Reporting standards score<br>(max 21) |     |     |                     |
|------------------------|-----|------------------------------------------------|-----|-----|---------------------|---------------------------------------|-----|-----|---------------------|
|                        |     | Mean<br>(SD)                                   | Min | Max | Mean<br>Adherence % | Mean<br>(SD)                          | Min | Max | Mean<br>Adherence % |
| Full sample            | 398 | 11.3 (2.2)                                     | 5   | 17  | 59.6                | 15.5 (1.8)                            | 9   | 19  | 73.9                |
| Year                   |     |                                                |     |     |                     |                                       |     |     |                     |
| Pre-2014               | 138 | 11.2 (2.3)                                     | 5   | 17  | 58.9                | 15.2 (1.9)                            | 9   | 19  | 72.3                |
| 2014 and beyond        | 260 | 11.4 (2.1)                                     | 5   | 17  | 60.0                | 15.7 (1.7)                            | 10  | 19  | 74.7                |
| Study sponsor*         |     |                                                |     |     |                     |                                       |     |     |                     |
| Academic               | 53  | 11.3 (2.4)                                     | 7   | 16  | 59.7                | 15.8 (1.7)                            | 11  | 19  | 75.0                |
| Government             | 153 | 11.5 (2.1)                                     | 6   | 17  | 60.7                | 15.8 (1.6)                            | 10  | 19  | 75.4                |
| Healthcare Org         | 23  | 12.4 (2.1)                                     | 6   | 17  | 65.4                | 16.2 (1.7)                            | 12  | 19  | 77.2                |
| Industry               | 16  | 11.5 (2.1)                                     | 6   | 14  | 60.5                | 15.7 (1.5)                            | 12  | 19  | 74.7                |
| Intergovernmental      | 41  | 11.8 (2.0)                                     | 7   | 16  | 61.9                | 15.6 (1.6)                            | 13  | 19  | 74.4                |
| Foundation             | 56  | 11.4 (2.3)                                     | 7   | 17  | 60.2                | 15.6 (1.7)                            | 12  | 19  | 74.1                |
| BMGF                   | 74  | 11.4 (2.1)                                     | 6   | 16  | 60.1                | 15.8 (1.8)                            | 10  | 19  | 75.4                |
| Other                  | 24  | 11.1 (2.6)                                     | 6   | 16  | 58.6                | 15.4 (1.9)                            | 11  | 19  | 73.2                |
| Cite reference case    | 9   | 11.8 (2.4)                                     | 9   | 17  | 62.0                | 16.6 (1.6)                            | 15  | 19  | 78.8                |
| Clinical journal       | 318 | 11.5 (2.1)                                     | 5   | 17  | 60.3                | 15.6 (1.7)                            | 10  | 19  | 74.2                |
| Non-clinical journal   | 80  | 10.8 (2.5)                                     | 5   | 15  | 56.8                | 15.2 (2.1)                            | 9   | 19  | 72.5                |
| Journal impact factor# |     |                                                |     |     |                     |                                       |     |     |                     |
| High                   | 336 | 11.5 (2.1)                                     | 5   | 17  | 60.5                | 15.6 (1.8)                            | 9   | 19  | 74.1                |
| Medium                 | 45  | 10.7 (2.4)                                     | 5   | 14  | 56.1                | 15.3 (1.6)                            | 12  | 19  | 73.0                |
| Low                    | 12  | 9.5 (1.3)                                      | 8   | 12  | 50.0                | 14.8 (2.0)                            | 11  | 18  | 70.6                |

BMGF: Bill and Melinda Gates Foundation

\*Categories are not mutually exclusive. #Journal impact factor categories defined by 2016 SCImago Journal Rank quartile: high = first quartile; medium = second quartile; low = third and fourth quartiles. Five journals' impact factors were not available.

162 Of the 213 articles published after 2014 (i.e. 2015-2017), only 9 (4%) cited the iDSI  
163 reference case. For articles that did so, adherence to reporting standards averaged 79%, five  
164 percentage points higher than mean adherence for the full sample, while adherence to  
165 methodology specifications did not differ from adherence for the full sample. Funding source  
166 (BMGF vs. non-BMGF) was not significantly associated with adherence scores for either  
167 reporting (mean score of 75% vs. 74%) or methodology (mean score of 60% vs. 60%).

168 Studies published in clinical journals had marginally higher adherence (74% reporting  
169 adherence, 60% methodology adherence) than studies in non-clinical journals (73% reporting  
170 adherence, 57% methodology adherence). On average, methodology adherence scores for  
171 articles published in high-impact journals exceeded the corresponding scores for studies  
172 published in low-impact journals (61% vs. 50%); for reporting adherence, the corresponding  
173 difference was 74% vs. 71%.

174 Reporting standard adherence slightly increased after publication of the reference case  
175 compared to the pre-2014 period (72% adherence pre-2014 vs. 75% post-2014,  $p < 0.01$ ) (Figure  
176 1). Methodological adherence did not improve (59% adherence pre-2014 vs. 60% post-2014,  $p =$   
177 0.53).

178

179 **Figure 1: Reference case adherence percentages and number of cost-per-DALY averted**  
180 **studies over time**

181

### 182 *Methodological specifications versus reporting standards*

183 Across the 11 principles, reporting standard adherence exceeded methodological  
184 specification adherence by 14 percentage points (74% vs. 60%). Reporting standard adherence

185 was highest for the following principles: uncertainty (mean of 100%), comparator (97%), and  
186 evidence (95%). Methodological specification adherence was highest for the outcome measure  
187 (100%), transparency (89%), and evidence (74%) principles (Figure 2).

188

189 **Figure 2: Box plot of article adherence percentage distribution for methodological**  
190 **specifications and reporting standards**

191

192 Reporting standard adherence exceeded methodological specification adherence for the  
193 following principles: comparator (97% vs. 36%), evidence (95% vs. 74%), time  
194 horizon/discounting (82% vs. 57%), perspective (85% vs. 64%), and uncertainty (100% vs. 57%)  
195 (Figure 3). Methodology adherence scores were higher than reporting adherence scores for the  
196 following principles: transparency (86% vs. 89%), outcome (54% vs. 100%), and costs (54% vs.  
197 65%). Articles seldom addressed the budget impact (9% reporting adherence, 10% methodology)  
198 or equity (7% reporting adherence, 7% methodology) (Figure 3).

199

200 **Figure 3: Percentage of articles adherent to reference case reporting standards compared**  
201 **to methodological specifications, by principle**

202

203 ***Sensitivity analyses***

204 Inclusion of optional criteria in our adherence score calculation decreased mean reporting  
205 adherence by 22 percentage points (from 74% to 52%) and mean methodological adherence by  
206 14 percentage points (60% to 46%). When we limited the post-evaluation period to 2016-2017  
207 (base case, 2015-2017), improvement in reporting standards post-publication no longer achieved

208 significance. However, altering the comparator principle criteria (base case: comparator must be  
209 standard of care; alternative: comparator can be any intervention other than “do-nothing”) had  
210 little impact.

## 211 **Discussion**

212 Since its release in 2014, adherence to the iDSI reference case among published cost-per-  
213 DALY averted studies has improved for reporting, but not for methods. We also found that  
214 adherence to the reference case’s reporting standards exceeds adherence to its methodological  
215 specifications, perhaps reflecting the relative ease of revising the way information is presented  
216 and greater effort needed to conform to analytic requirements. Moreover, other reporting  
217 guidelines, such as CHEERS (17), may have independently promoted more rigorous reporting,  
218 with the unintended effect of boosting adherence to the iDSI reporting standards

219 However, reporting and methodological adherence rates varied substantially across  
220 reference case principles, demonstrating ways in which articles are falling short of guidelines.  
221 For example, articles almost always report their comparator clearly (as recommended by the  
222 comparator reporting standard), but do not necessarily specify standard of care as the comparator  
223 (as recommended by the comparator methodological specification). Similarly, all articles  
224 reported findings from sensitivity analyses (as recommended by the uncertainty reporting  
225 standard), but did not always conduct structural, probabilistic, and deterministic analyses (as  
226 recommended by the uncertainty methodological specification). In some cases, methodological  
227 specification adherence exceeded reporting standards adherence. For example, articles often  
228 included implementation costs (as recommended by the costs methodological specification), but  
229 did not as frequently report these costs in both US dollars (USD) and local currency (as  
230 recommended by the costs reporting standards). Because the reporting and methods standards

231 address distinct issues, future reference case specifications should continue to include both types  
232 of requirements.

233         The limited improvement in adherence to the iDSI reference case from 2011 to 2017  
234 might reflect the competing influences of other guidelines, as authors may prioritize adherence to  
235 local guidelines or longstanding best practices (1, 8). The reference case aims to address the gap  
236 in guidance that exists for countries that cannot or have not yet created their own guidelines for  
237 economic evaluation. Local guidelines, which are tailored to their applicable context, may  
238 conflict with reference case guidelines; for example, the South African pharmacoeconomic  
239 guidelines recommend a 5% discount rate, which differs from the 3% value recommended by the  
240 reference case (18). Although the overall principle of the iDSI reference case supports the use of  
241 alternative discount rates where appropriate to the decision problem and constituency,  
242 researchers who adhere to the local guidelines may appear non-adherent to the methodological  
243 specifications as scored in this analysis.

244         Another possible explanation for relatively low adherence for certain items is that authors  
245 are not aware of the guidelines. Though the developers of the reference case have presented at  
246 various scientific meetings (19) and formally published the guidelines in 2016 (11), the BMGF  
247 and iDSI have focused educational campaigns on national payers and health technology  
248 assessment (HTA) agencies in LMICs, rather than on researchers, who are primary authors of  
249 published studies (16). Future studies should examine whether the reference case has influenced  
250 country-specific guidelines, such as Thailand's HTA assessment guideline (6).

251         It is important to consider what level of adherence should be considered satisfactory.  
252 Although articles in our sample were more adherent to reporting guidelines, they adhered to just  
253 over half of methodological specifications. Adherence scores were notably lower for particular



254 principles - heterogeneity, budget impact, and equity - indicating an overall neglect of these  
255 issues in cost-per-DALY averted studies. The adherence scores are perhaps best thought of as a  
256 baseline against which to measure improvement, and as a call to action to promote higher quality  
257 and comparability.

### 258 *Limitations*

259 Our analysis has the following limitations. First, our use of dichotomous (i.e. “yes/no”)  
260 questions to score adherence may be inconsistent with the more nuanced goals of the iDSI  
261 reference case. Because the reference case is designed to be applicable in a range of different  
262 country-specific contexts, it must balance the goals of study comparability and quality against  
263 the goal of local applicability (16, 20, 21). To address this limitation, we omitted “optional”  
264 standards from our adherence calculation for the base case. That is, we assumed that the  
265 “optional” elements represent conditional requirements intended by the reference case authors to  
266 allow for local adaptability. Our sensitivity analysis that included all elements in our calculation  
267 of the adherence score (i.e. both the “required” and “optional” elements) yielded lower  
268 adherence scores.

269 Second, assessing adherence to the comparator methodological specification posed a  
270 particular challenge because this assessment depends on judging whether the specified  
271 comparator constitutes standard of care therapy. We explored the potential influence of our  
272 judgments by conducting a sensitivity analysis that redefined adherence to include any  
273 comparator other than “do nothing” interventions. This alternative itself posed a challenge  
274 because the “do nothing” intervention constitutes “standard of care” for some conditions in some  
275 settings. In any case, the fact that substantially altering this standard’s definition had little  
276 impact on our findings is reassuring.

277

278 Third, because the Tufts Medical Center Global Health CEA Registry catalogs only  
279 published cost-per-DALY averted studies, our findings cannot be generalized to the rest of the  
280 economic evaluation literature. For example, our analysis excluded gray literature (i.e., material  
281 not disseminated in regularly published, indexed journals). Gray literature may be more  
282 prevalent in some countries, especially those without local guidelines.

283 Fourth, our approach for scoring articles inherently involves reviewer judgement to  
284 determine author intent and to resolve ambiguities (e.g., determining whether the comparator is  
285 “clearly” stated). We attempted to mitigate this problem by having two reviewers read each  
286 article and, in cases where they could not reach agreement, appeal to a third reviewer.

287 Finally, our study’s post-evaluation period may not be sufficiently long to detect the  
288 impact of the reference case; as noted, the iDSI reference case was officially published in an  
289 academic journal in 2016 (11). More time may be needed for the field to adopt these guidelines.

### 290 *Policy implications*

291 As posited by Nugent and Briggs, future research on the subject should ask, “what  
292 specific help does the iDSI reference case offer the analyst, who, while attempting to conform to  
293 the principles, nevertheless has to choose and implement the methods?” (22). It is possible that  
294 the methodological guidelines impose an excessive burden on researchers, raising “issues about  
295 the resources and data requirements to meet the principles” (16).

296 Future qualitative research should focus on researcher experience when conducting  
297 global health-focused CEAs and on how to increase its acceptance among authors. Studies could  
298 also evaluate the methods and reporting practices for articles that strongly adhere to the iDSI  
299 reference case, as these analyses may serve as useful examples for other CEA authors attempting

300 to adhere to the guidelines. Future research should also evaluate the influence of the reference  
301 case on how decision makers perceive the quality and usefulness of economic evaluations.

302         Moving from guideline development to implementation is a vital step towards improving  
303 the utility of economic evaluations in global health. Future efforts could include additional  
304 educational workshops for researchers, students, and policymakers. Policymakers and major  
305 funders of economic evaluations, such as the BMGF, could require that researchers adhere to  
306 reference case recommendations.

### 307 **Conclusion**

308         Our results indicate that the iDSI reference case has slightly improved reporting practices  
309 of economic evaluations focused on global health, but not methodological practices. The  
310 reference case has substantial potential to serve as a resource for researchers and policy makers  
311 in global health and economics, but more effort to promote adherence and awareness may be  
312 needed.

313

314 **Works cited**

315

316 1. Weinstein MC, Siegel JE, Gold MR, Kamlet MS, Russell LB. Recommendations of the Panel on  
317 Cost-effectiveness in Health and Medicine. *Jama*. 1996;276(15):1253-8.

318 2. Russell LB, Gold MR, Siegel JE, Daniels N, Weinstein MC. The role of cost-effectiveness  
319 analysis in health and medicine. *JAMA*. 1996;276:1172-7.

320 3. Sanders GD, Neumann PJ, Basu A, Brock DW, Feeny D, Krahn M, et al. Recommendations for  
321 conduct, methodological practices, and reporting of cost-effectiveness analyses: second panel on cost-  
322 effectiveness in health and medicine. *Jama*. 2016;316(10):1093-103.

323 4. Baltussen RM, Adam T, Tan-Torres Edejer T, Hutubessy RC, Acharya A, Evans DB, et al.  
324 Making choices in health: WHO guide to cost-effectiveness analysis. 2003.

325 5. Eldessouki R, Smith MD. Health care system information sharing: a step toward better health  
326 globally. *Value in Health Regional Issues*. 2012;1(1):118-20.

327 6. Teerawattananon Y. Thai health technology assessment guideline development. *Journal of the*  
328 *Medical Association of Thailand*. 2011;91(6):11.

329 7. Pharmaceutical Benefits Advisory Committee. Guidelines for preparing submissions to the  
330 Pharmaceutical Benefits Advisory Committee (PBAC). Version 5.0, September 2016. Canberra:  
331 Department of Health; 2016.

332 8. Rawlins MD, Culyer AJ. National Institute for Clinical Excellence and its value judgments. *BMJ:*  
333 *British Medical Journal*. 2004;329(7459):224.

334 9. Santatiwongchai B, Chantarastapornchit V, Wilkinson T, Thiboonboon K, Rattanavipapong W,  
335 Walker DG, et al. Methodological variation in economic evaluations conducted in low-and middle-  
336 income countries: information for reference case development. *PLoS One*. 2015;10(5):e0123853.

337 10. Bill WT, Gates M. Foundation Methods for Economic Evaluation Project (MEEP): Final Report  
338 NICE International. York, UK. 2013.

339 11. Wilkinson T, Sculpher MJ, Claxton K, Reville P, Briggs A, Cairns JA, et al. The international  
340 decision support initiative reference case for economic evaluation: an aid to thought. *Value in health*.  
341 2016;19(8):921-8.

342 12. Center for the Evaluation of Value and Risk in Health (CEVR). Global Health Cost-Effectiveness  
343 Registry. In: Center TM, editor. [www.ghcearegistry.org/](http://www.ghcearegistry.org/). 2018.

344 13. Neumann PJ, Anderson JE, Panzer AD, Pope EF, D'Cruz BN, Kim DD, et al. Comparing the  
345 cost-per-QALYs gained and cost-per-DALYs averted literatures. *Gates Open Research*. 2018;2.

346 14. Harris PA, Taylor R, Thielke R, Payne J, Gonzalez N, Conde JG. Research electronic data  
347 capture (REDCap)—a metadata-driven methodology and workflow process for providing translational  
348 research informatics support. *Journal of biomedical informatics*. 2009;42(2):377-81.

349 15. Scimago Journal & Country Rank. Journal Rankings  
350 <https://www.scimagojr.com/journalrank.php2018> [

351 16. Gray AM, Wilkinson T. Economic evaluation of healthcare interventions: old and new directions.  
352 *Oxford Review of Economic Policy*. 2016;32(1):102-21.

353 17. Husereau D, Drummond M, Petrou S, Carswell C, Moher D, Greenberg D, et al. Consolidated  
354 Health Economic Evaluation Reporting Standards (CHEERS) statement. *Value Health*. 2013;16(2):e1-5.

355 18. Matsoso MP. Guidelines for Pharmacoeconomic Submissions: National Department of Health;  
356 2012 [Available from:  
357 [https://www.ispor.org/PEguidelines/source/PEGazette\\_February2013\\_SouthAfrica.pdf](https://www.ispor.org/PEguidelines/source/PEGazette_February2013_SouthAfrica.pdf).

358 19. Wilkinson T, editor Gates Reference Case: background, structure and content. ISPOR 19 Annual  
359 International Meeting; 2014; Montreal, QC, Canada.

360 20. Sculpher M, Pang F, Manca A, Drummond M, Golder S, Urdahl H, et al. Generalisability in  
361 economic evaluation studies in healthcare: a review and case studies. 2004.

362 21. Murray CJ, Evans DB, Acharya A, Baltussen RM. Development of WHO guidelines on  
363 generalized cost-effectiveness analysis. *Health economics*. 2000;9(3):235-51.

364 22. Briggs A, Nugent R. Editorial. *Health Economics*. 2016;25(Suppl Suppl 1):6-8.

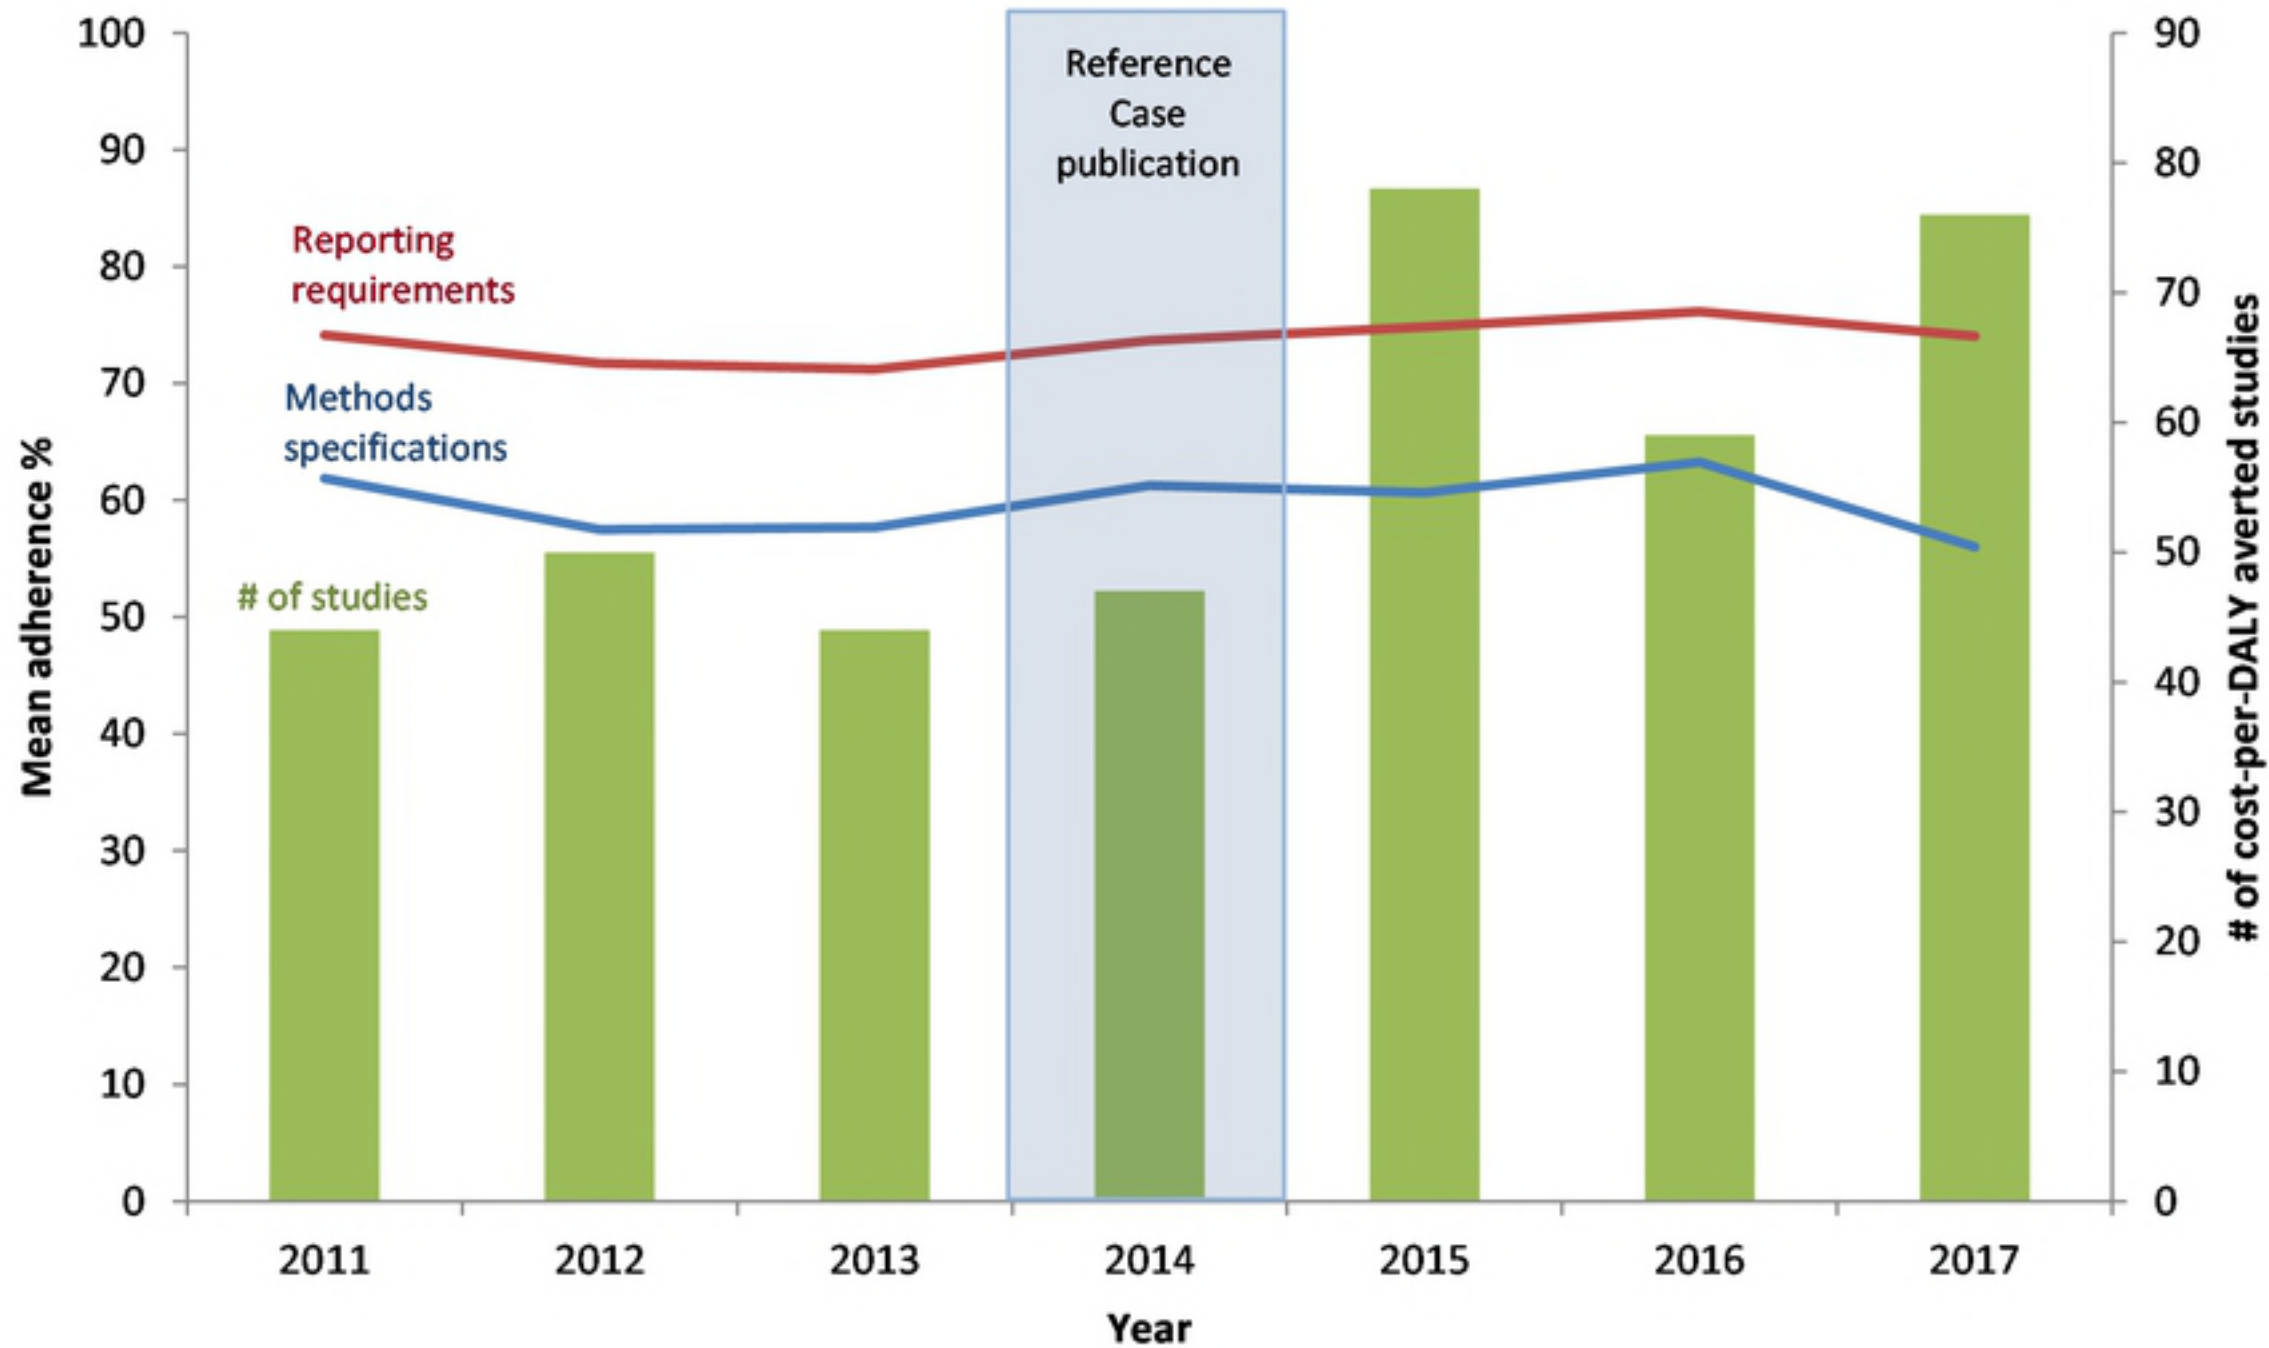

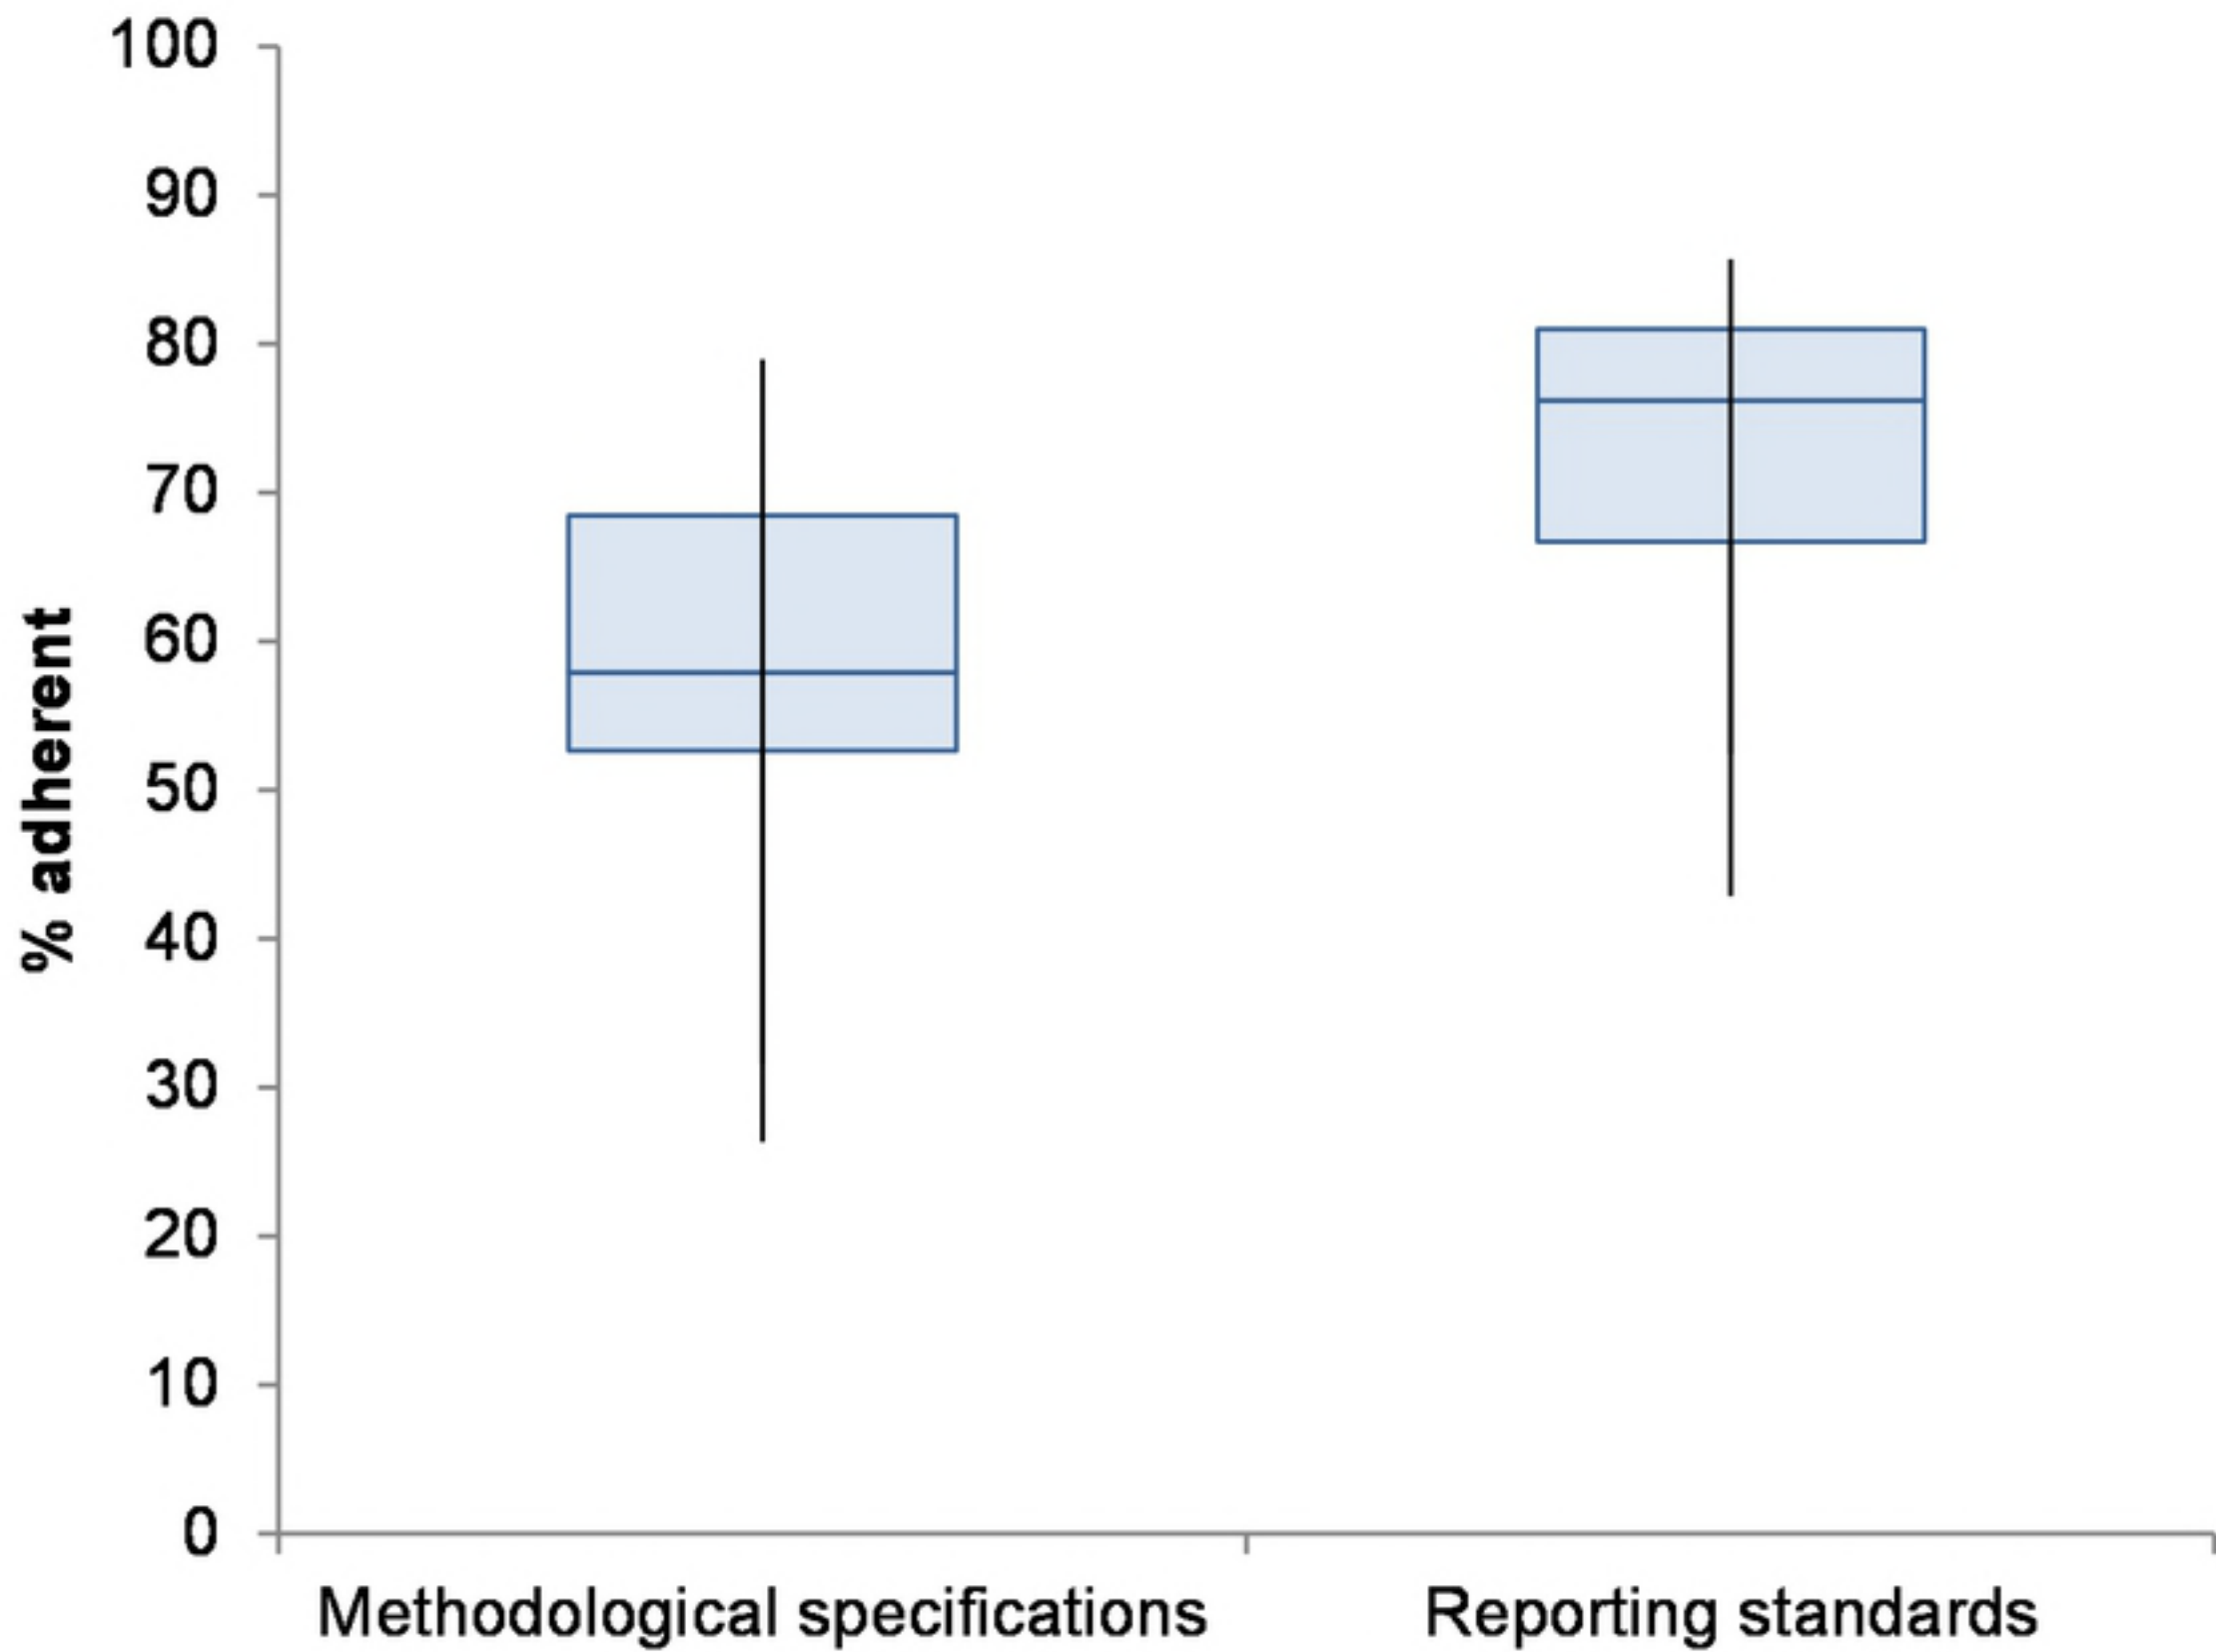

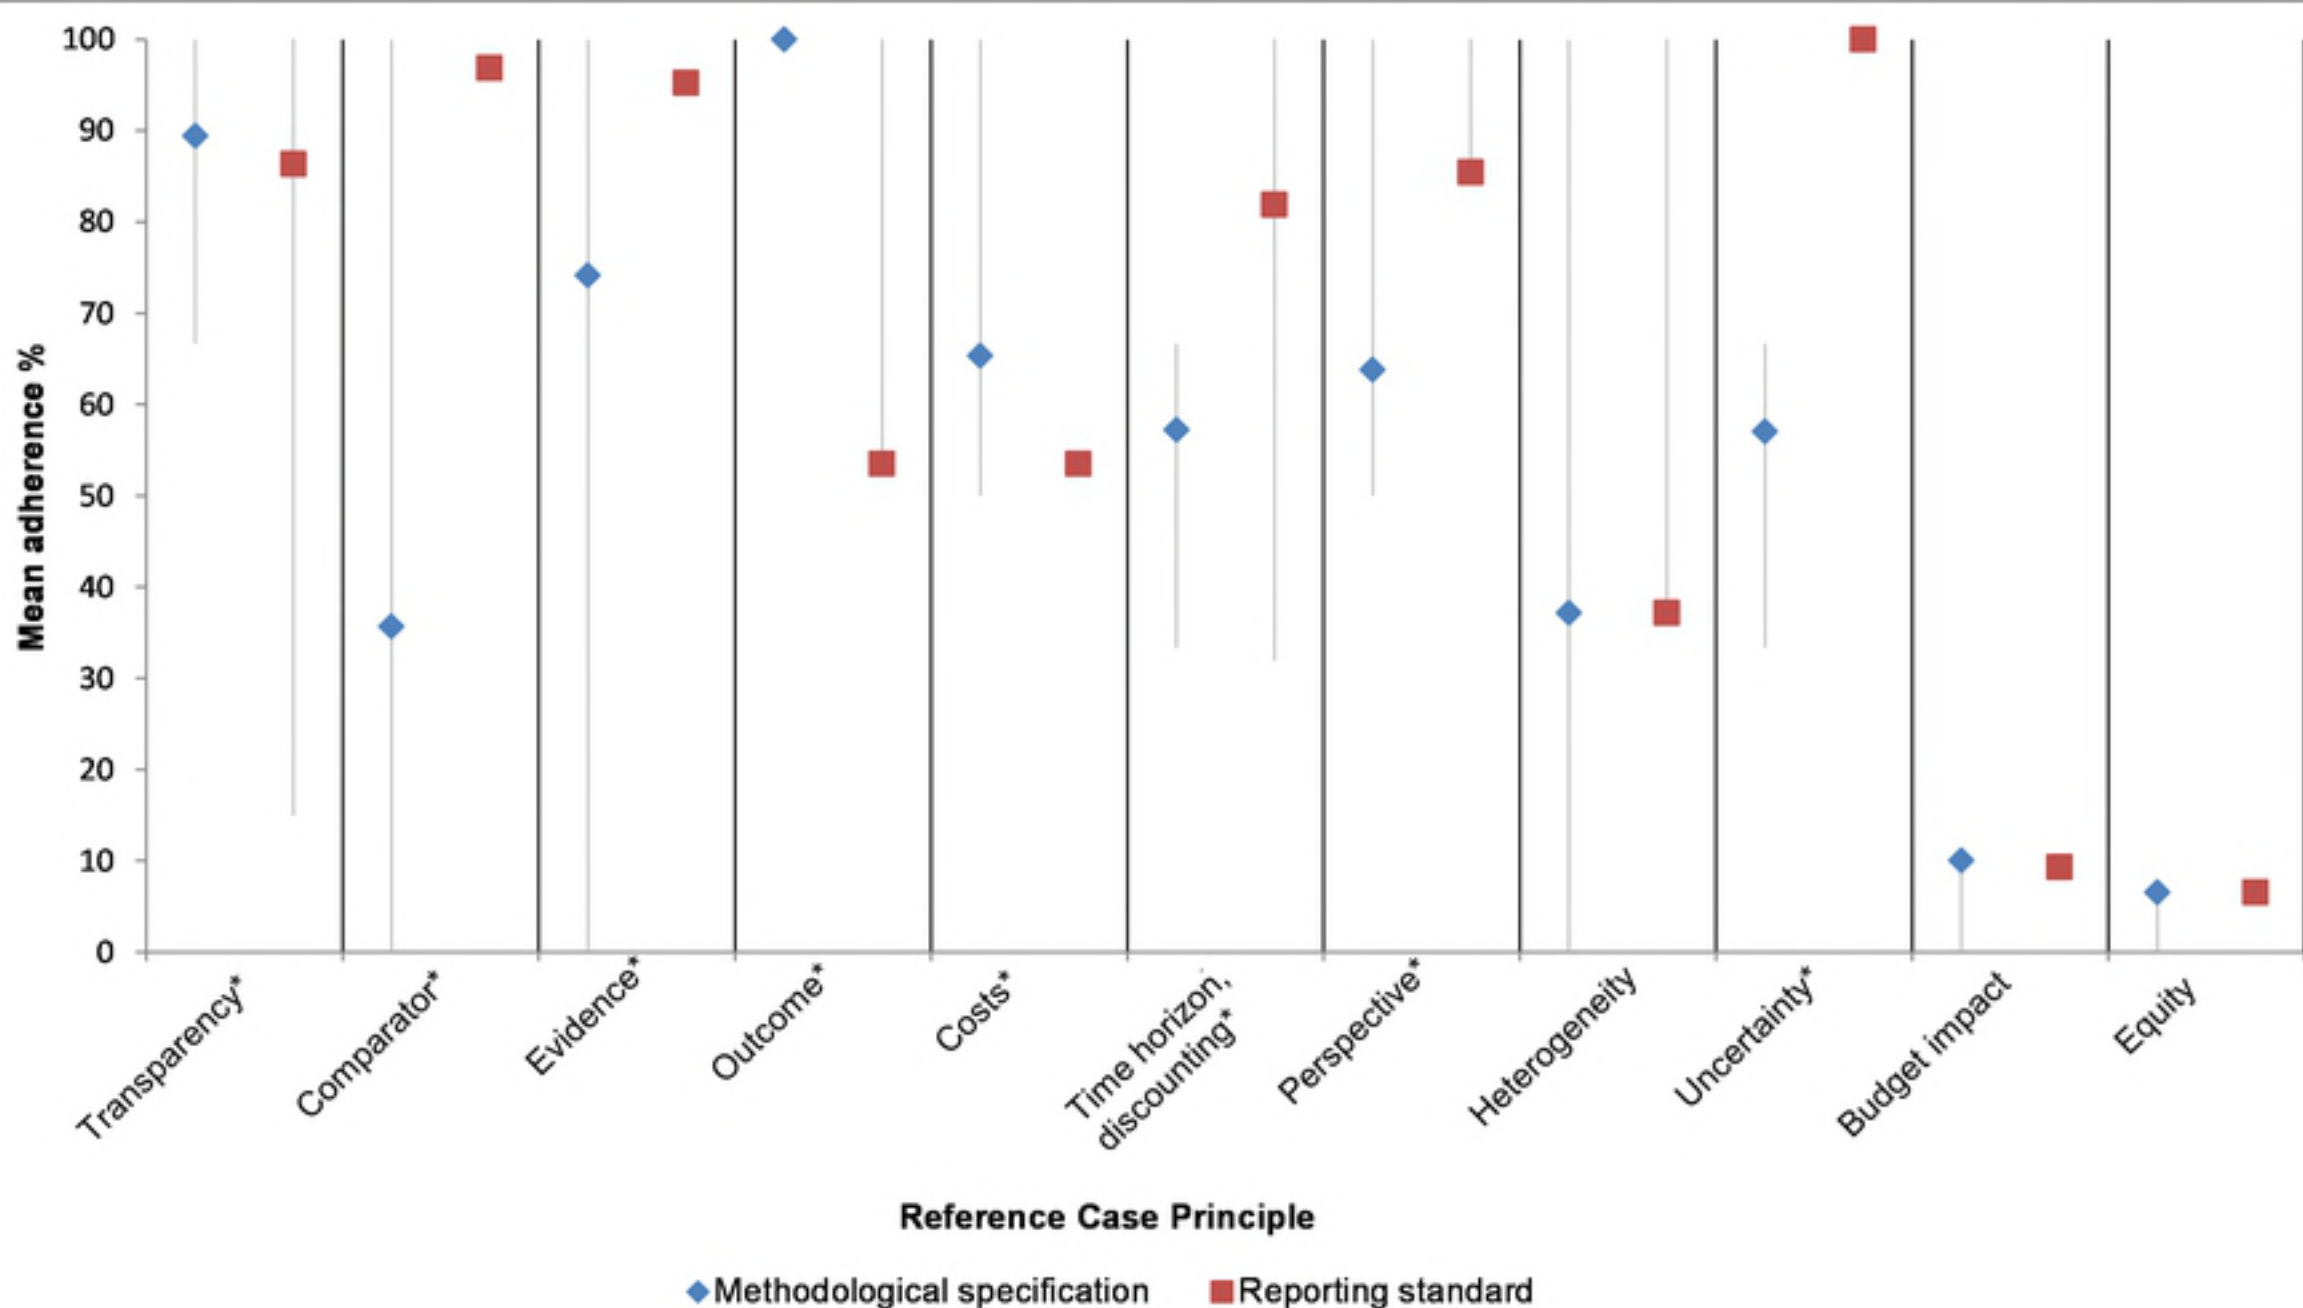

Error bars indicate interquartile range. \* indicates statistically significant difference ( $p < 0.01$ ) between the principle's reporting standard adherence % and its methodological specification adherence %.
